# Supplementary material
Source: PubMed Central journal article supplement (PMC4324123)

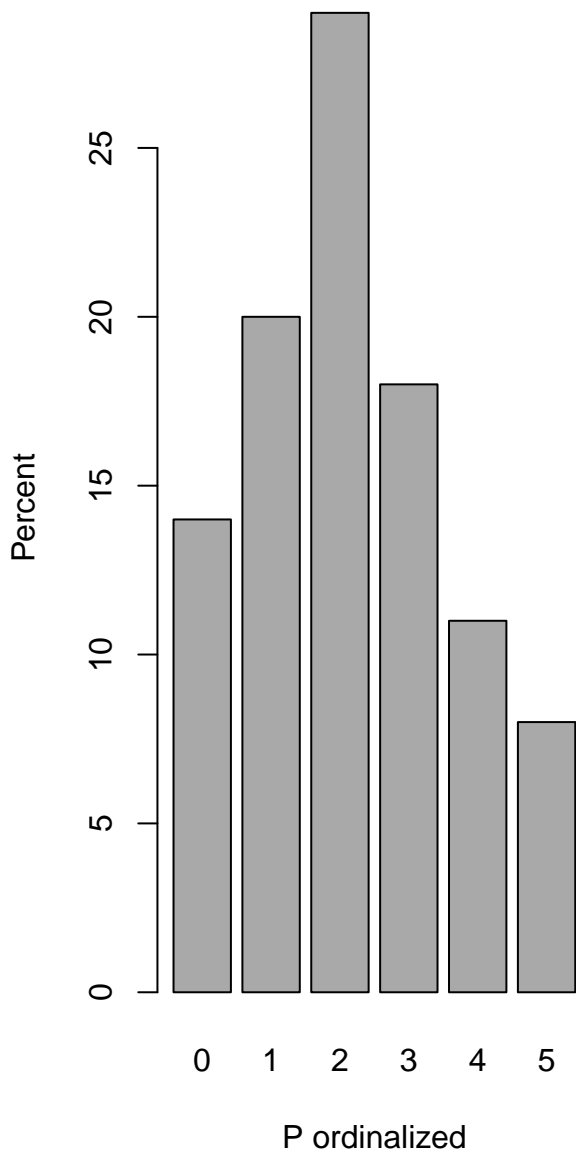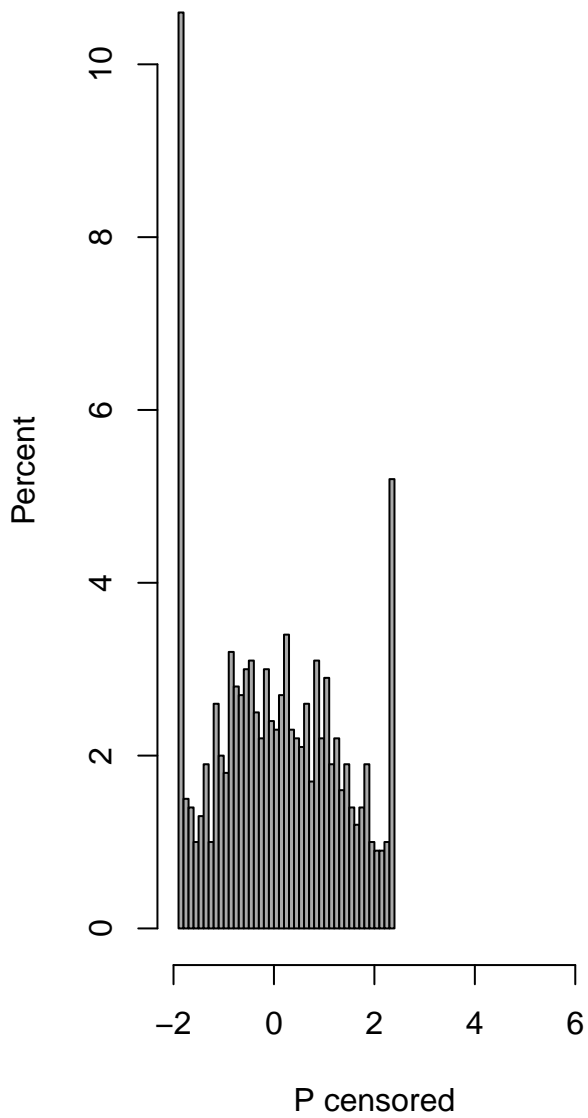

Supplement: NIHMS657202-supplement-Figure_S1_.pdf [file NIHMS657202-supplement-Figure_S1_.pdf]
